# Supplementary material for: Theoretical Studies of Cyanophycin Dipeptides as Inhibitors of Tyrosinases
Source: Int J Mol Sci. 2022 Mar 19;23(6):3335. doi: 10.3390/ijms23063335 (PMC8950311; doi:10.3390/ijms23063335)
Supplement: Supplementary file 1 [file ijms-23-03335-s001.zip › ijms-1625532-supplementary.pdf]

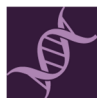

## Supplementary Information

Article

# Theoretical Studies of Cyanophycin Dipeptides as Inhibitors of Tyrosinases

Agnieszka Krzemińska <sup>†</sup>, Natalia Kwiatos <sup>\*,†</sup>, Franciela Arenhart Soares <sup>†</sup> and Alexander Steinbüchel

International Center for Research on Innovative Biobased Materials (ICRI-BioM)—International Research Agenda, Lodz University of Technology, Żeromskiego 116, 90-924 Lodz, Poland; agnieszka.krzeminska-kowalska@p.lodz.pl (A.K.); franciela.arenhart-soares@p.lodz.pl (F.A.S.); alexander.steinbuchel@p.lodz.pl (A.S.)

\* Correspondence: natalia.kwiatos@p.lodz.pl

<sup>†</sup> These authors contributed equally to this work

**Citation:** Krzemińska, A.; Kwiatos, N.; Arenhart Soares, F.; Steinbüchel, A. Theoretical Studies of Cyanophycin Dipeptides as Inhibitors of Tyrosinases. *Int. J. Mol. Sci.* **2022**, *23*, 3335. <https://doi.org/10.3390/ijms23063335>

Academic Editor: Vitaliy Borisov

Received: 19 February 2022

Accepted: 17 March 2022

Published: 19 March 2022

**Publisher's Note:** MDPI stays neutral with regard to jurisdictional claims in published maps and institutional affiliations.

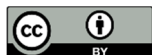

**Copyright:** © 2022 by the authors. Licensee MDPI, Basel, Switzerland. This article is an open access article distributed under the terms and conditions of the Creative Commons Attribution (CC BY) license (<https://creativecommons.org/licenses/by/4.0/>).

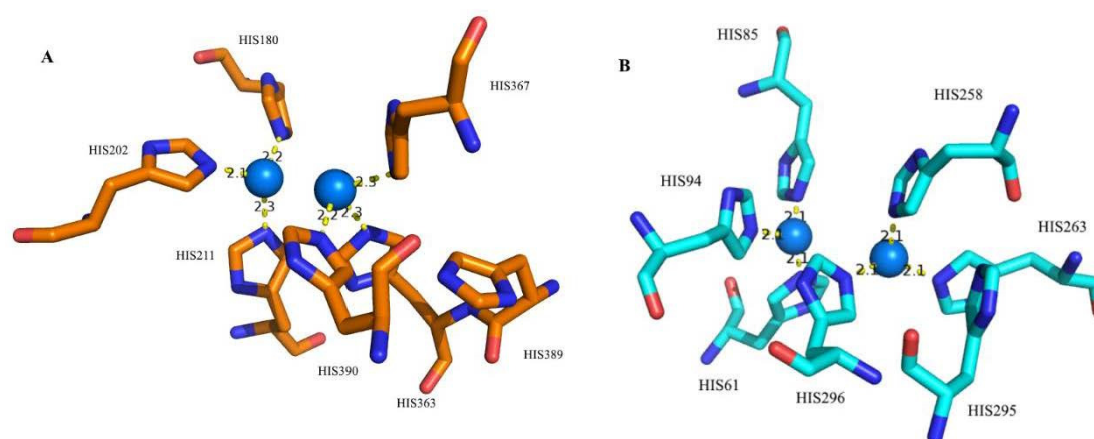

**Figure S1.** The distances between copper atoms at (A) TYR and (B) abTYR.

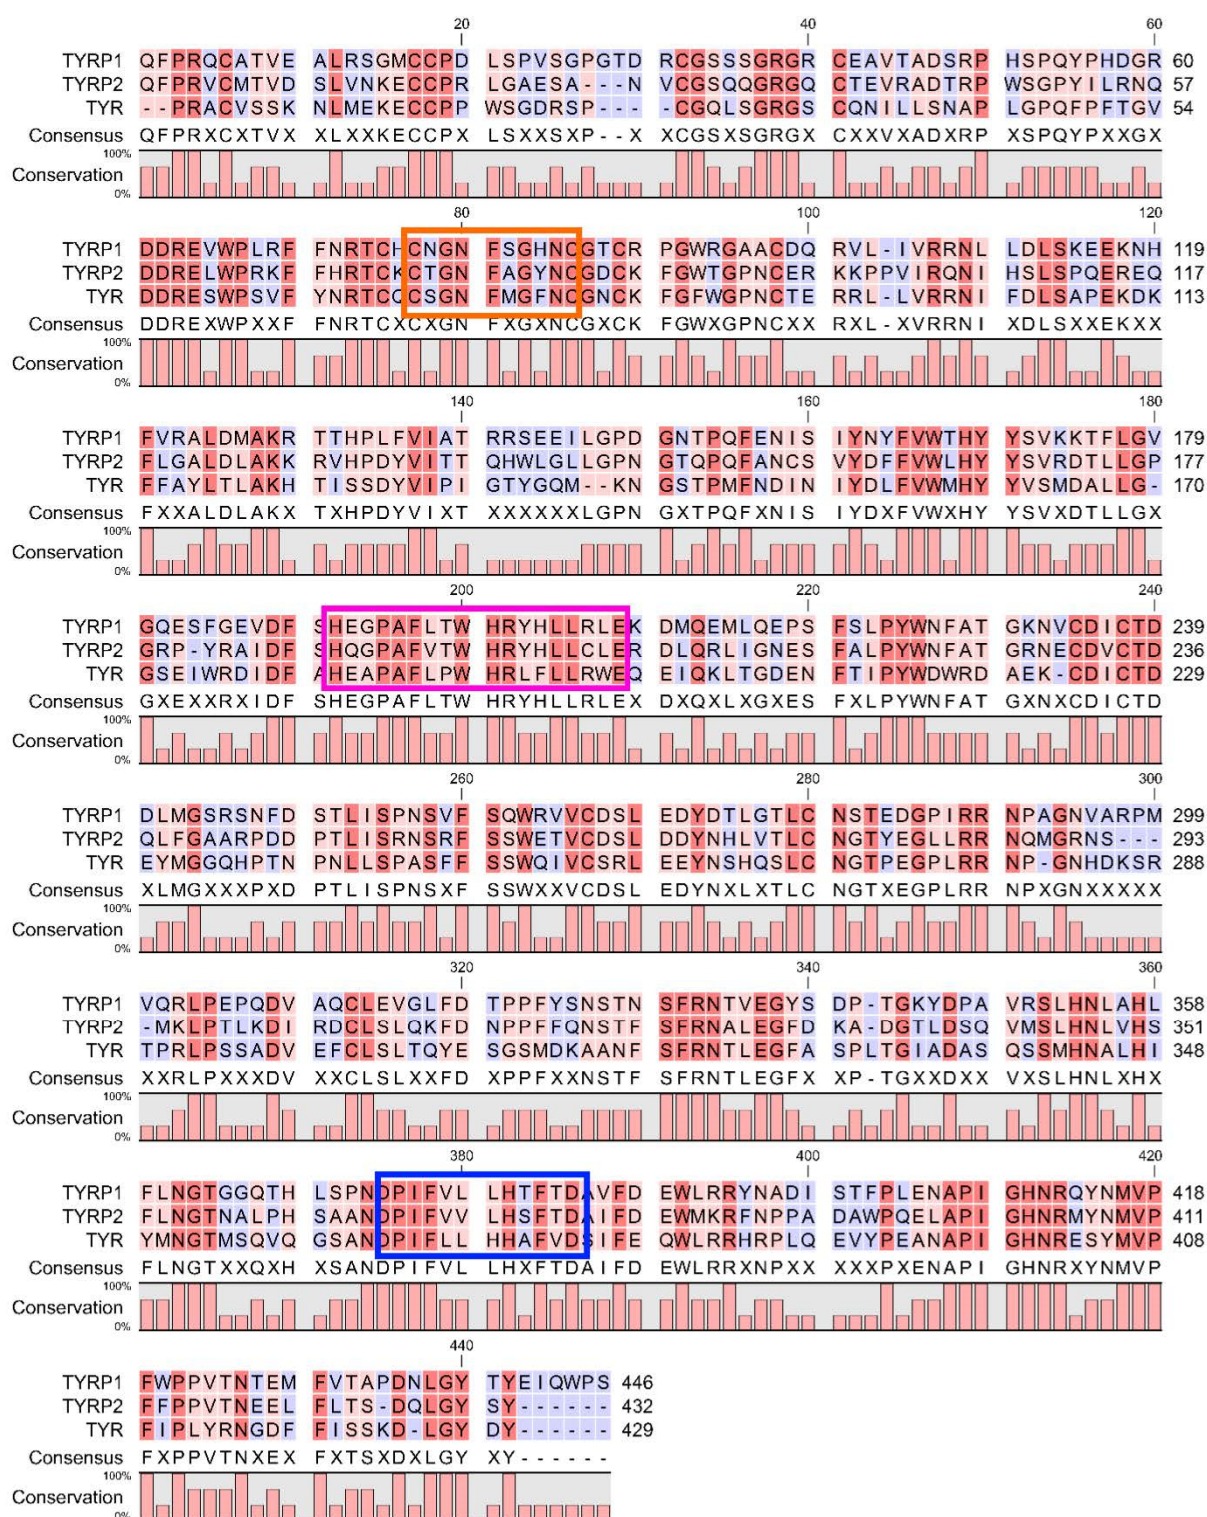

**Figure S2.** Multiple Sequence Alignment of TYR, TYRP1 and TYRP2. Magenta—CuA binding pattern, blue—CuB binding pattern, orange EFG pattern.

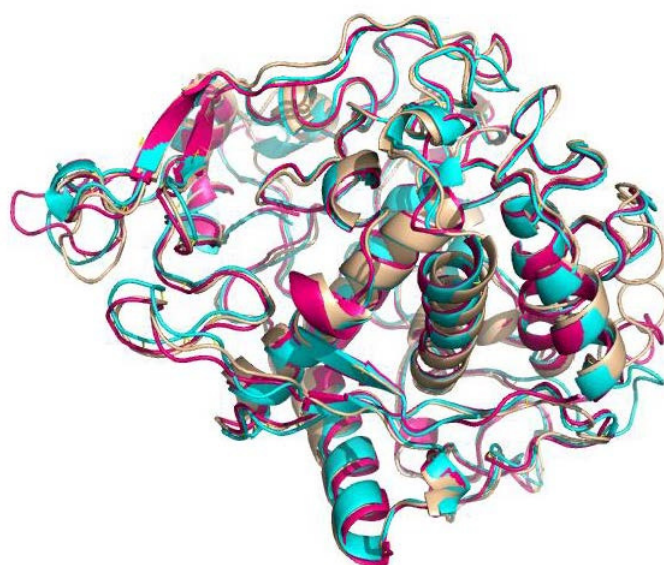

**Figure S3.** Alignment of TYR (wheat), TYRP1(magenta) and TYRP2 (cyan).

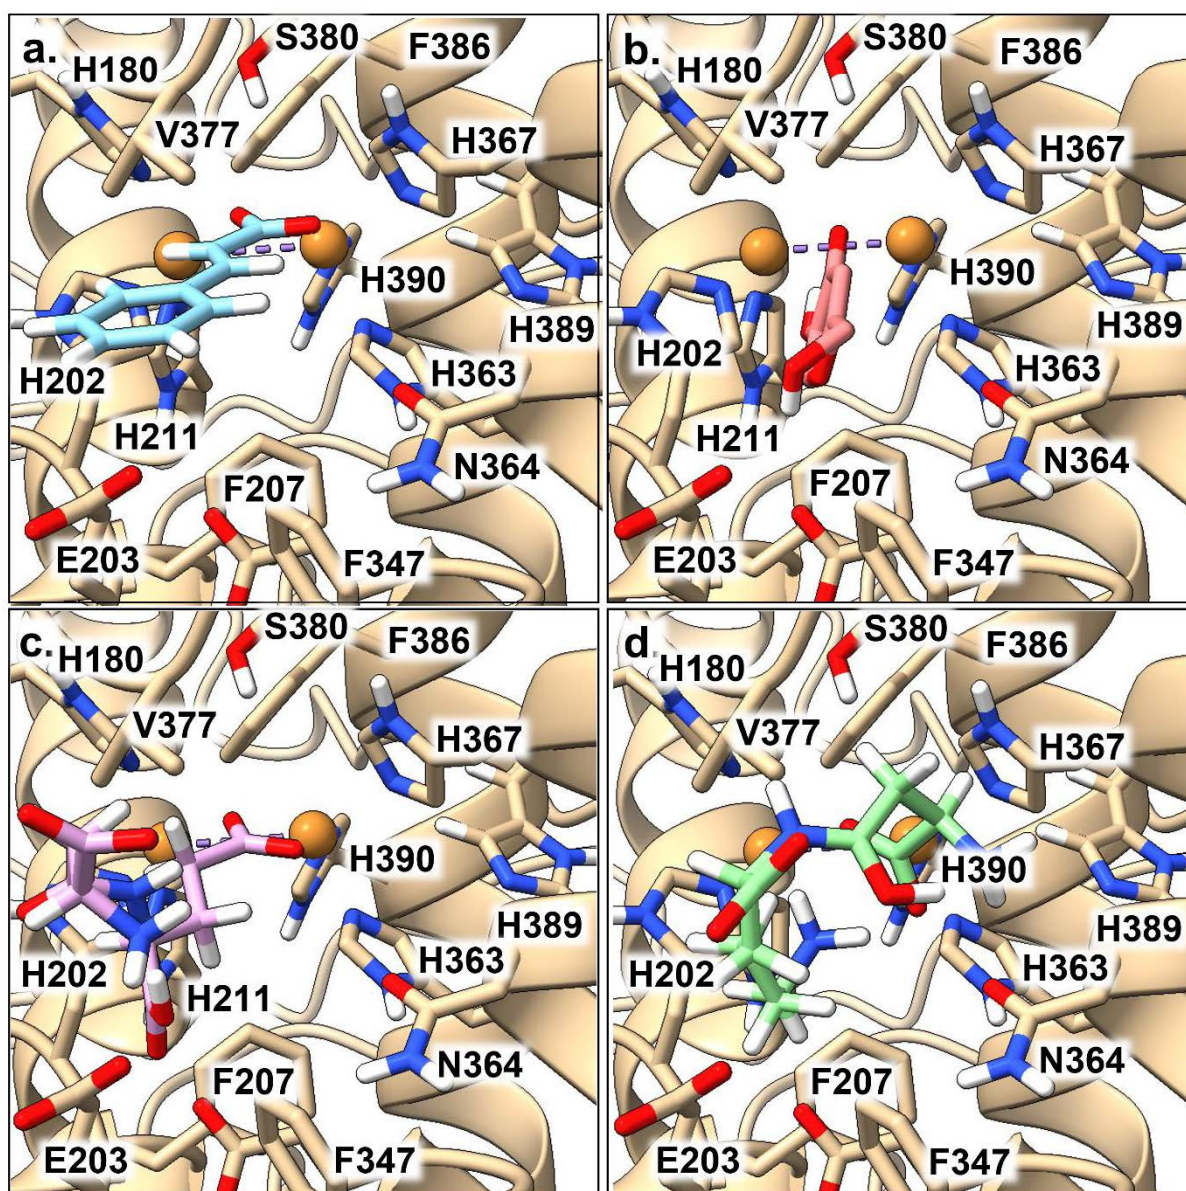

**Figure S4.** Ribbon representation of the TYR active site with two copper atoms (orange balls) in complex with (a) cinnamic acid, (b) kojic acid, (c) aspartate-glutamate (lig2), and (d) aspartate-lysine (lig4). Key amino acids that create interactions with ligands are labeled in black.

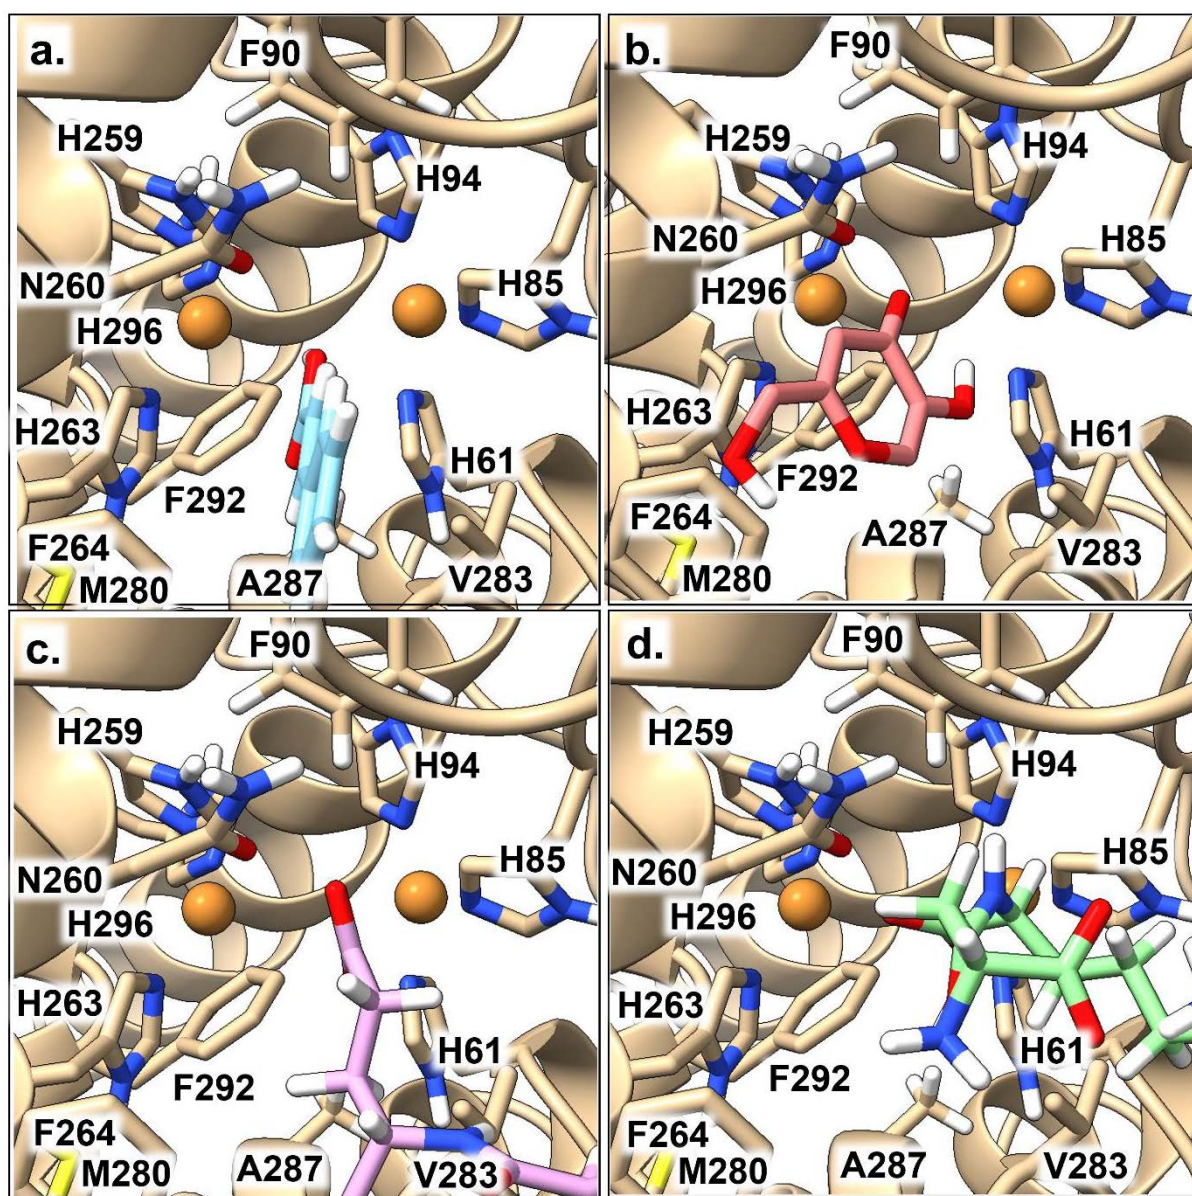

**Figure S5.** Ribbon representation of the abTYR active site with two copper atoms (orange balls) in complex with (a) cinnamic acid, (b) kojic acid, (c) aspartate-glutamate (lig2), and (d) aspartate-lysine (lig4). Key amino acids that create interactions with ligands are labeled in black.

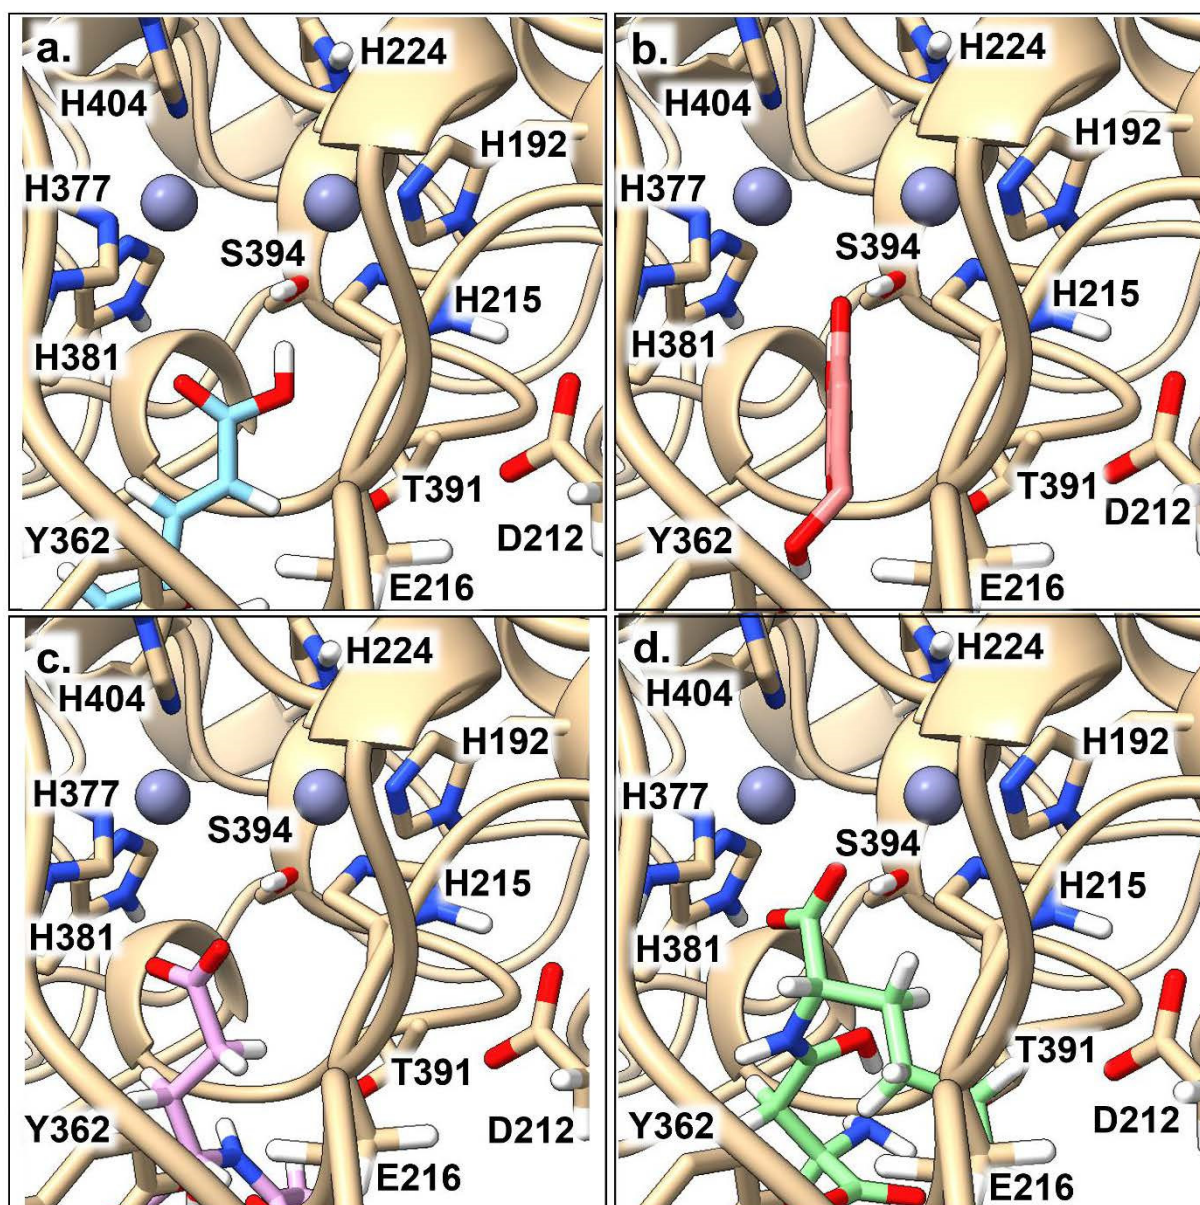

**Figure S6.** Ribbon representation of the TYRP1 active site with two zinc atoms (blue balls) in complex with (a) cinnamic acid, (b) kojic acid, (c) aspartate-glutamate (lig2), and (d) aspartate-lysine (lig4). Key amino acids that create interactions with ligands are labeled in black.

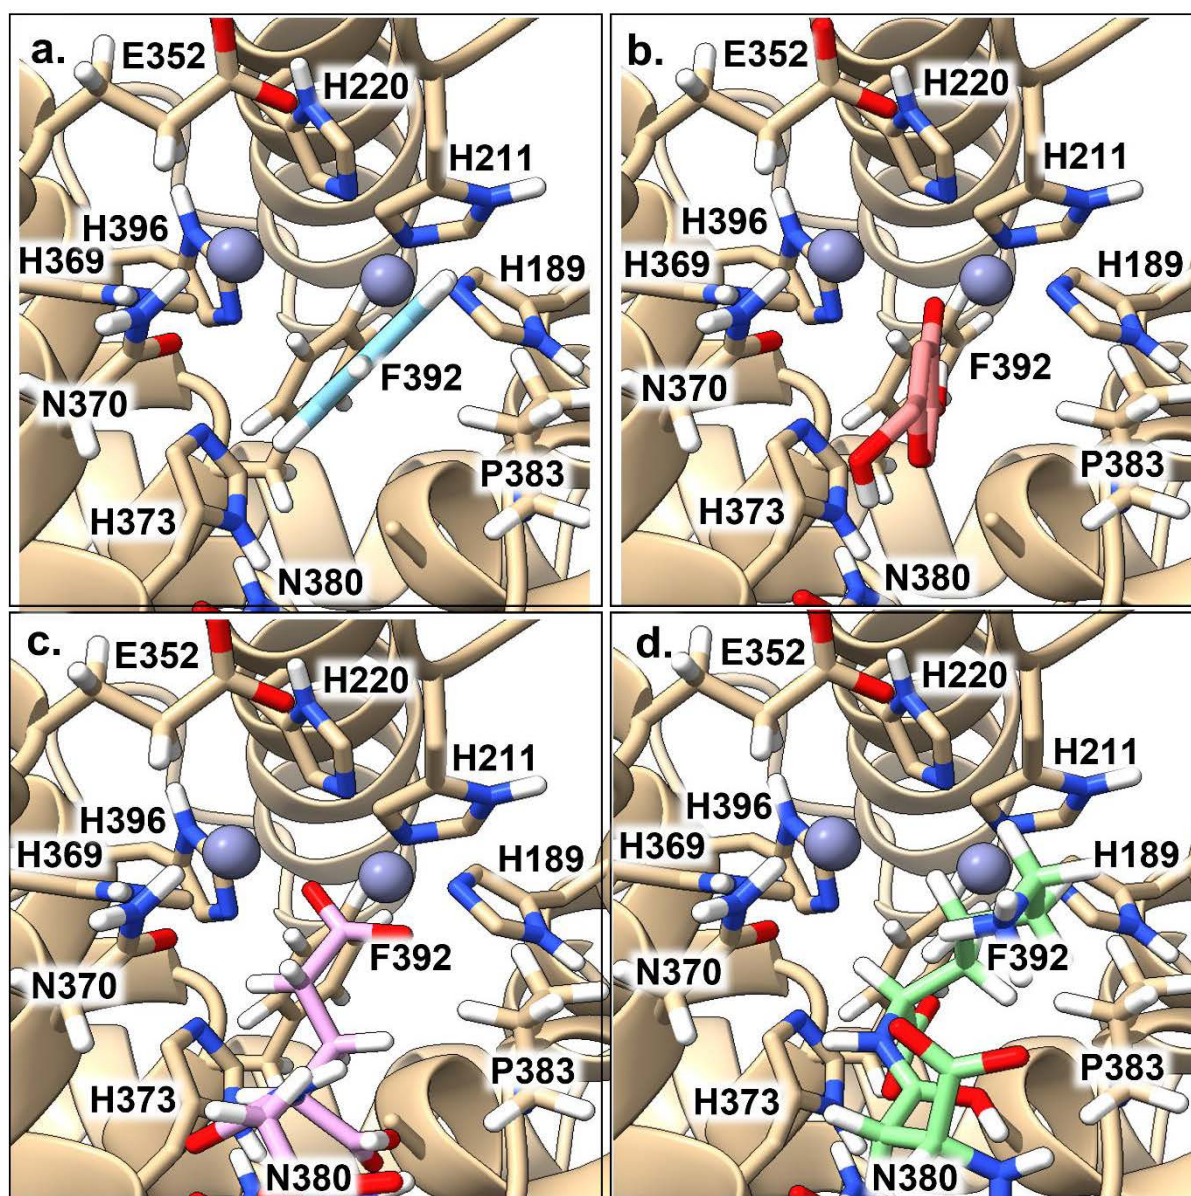

**Figure S7.** Ribbon representation of the TYRP2 active site with two zinc atoms (blue balls) in complex with (a) cinnamic acid, (b) kojic acid, (c) aspartate-glutamate (lig2), and (d) aspartate-lysine (lig4). Key amino acids that create interactions with ligands are labeled in black.
